# Supplementary material for: DAR 16-II Primes Endothelial Cells for Angiogenesis Improving Bone Ingrowth in 3D-Printed BCP Scaffolds and Regeneration of Critically Sized Bone Defects
Source: MDPI journal article supplement (doi:10.3390/biom12111619), 2022-11-02
Supplement: s1 [file s1]

# DAR 16-II Primes Endothelial Cells for Angiogenesis Improving Bone Ingrowth in 3D-Printed BCP Scaffolds and Regeneration of Critically Sized Bone Defects

Eman Alfayez <sup>1,2,†</sup>, Lorenzo Veschini <sup>2,†</sup>, Monica Dettin <sup>3</sup>, Annj Zamuner <sup>4</sup>, Massimiliano Gaetani <sup>5,6</sup>, Anna P. Carreca <sup>5</sup>, Stevo Najman <sup>7</sup>, Shahram Ghanaati <sup>8</sup>, Trevor Coward <sup>2</sup> and Lucy Di Silvio <sup>2,\*</sup>

<sup>1</sup> Faculty of Dentistry, Oral Biology Department, King Abdulaziz University, 21589 Jeddah, Saudi Arabia

<sup>2</sup> Faculty of Dentistry, Oral & Craniofacial Sciences King's College London, London SE1 9RT, UK

<sup>3</sup> Department of Industrial Engineering, University of Padua, 35131 Padua, Italy

<sup>4</sup> Department of Department of Civil, Environmental, and Architectural Engineering, University of Padua, 35131 Padua, Italy

<sup>5</sup> Fondazione Ricerca nel Mediterraneo (Ri.MED) and Department of Laboratory Medicine and Advanced Biotechnologies, Istituto di Ricovero e Cura a Carattere Scientifico-Istituto Mediterraneo per i Trapianti e Terapie ad Alta Specializzazione, 90100 Palermo, Italy

<sup>6</sup> Chemical Proteomics, Department of Medical Biochemistry and Biophysics, Karolinska Institutet and SciLifeLab (Science for Life Laboratory), SE-17 177 Stockholm, Sweden

<sup>7</sup> Faculty of Medicine, University of Niš, 18000 Niš, Serbia

<sup>8</sup> Department for Oral, Cranio-Maxillofacial and Facial Plastic Surgery, Medical Center of the Goethe University, 60323 Frankfurt, Germany

\* Correspondence: lucy.di\_silvio@kcl.ac.uk; Tel.: +02 07848 8475

† These authors equally contributed to this work.

**Table S1.** List of up-regulated proteins. Proteins increasing in amount in HUVEC cultured in the presence of DAR 16-II expressed as % increase over HUVEC cultured on gelatin. Only the proteins with highly statistically significant ( $p < 0.01$ ,  $n = 3$ ) differences are displayed in the table.

| UniProt Accession | Gene ID | Average Amount |                   |
|-------------------|---------|----------------|-------------------|
|                   |         | Change %       | Average deviation |
| P20839            | IMPDH1  | 227.8          | 1.8               |
| Q9H040            | SPRTN   | 182.3          | 35.1              |
| O95167            | NDUFA3  | 170.6          | 8.3               |
| Q9Y4Y9            | LSM5    | 126.6          | 25.9              |
| Q8TAK5            | GABPB2  | 114.3          | 12.3              |
| P02749            | APOH    | 106.9          | 32.2              |
| P02760            | AMBP    | 106.4          | 4.3               |
| Q86T82            | USP37   | 102.2          | 35.3              |
| P02787            | TF      | 101.7          | 29.5              |
| P01023            | A2M     | 94.6           | 25.2              |
| P23434            | GCSH    | 82.6           | 13.4              |
| Q9H8H2            | DDX31   | 79.5           | 3.9               |
| Q14520            | HABP2   | 79.1           | 16.2              |
| P02788            | LTF     | 77.8           | 23.0              |
| P02768            | ALB     | 77.7           | 21.6              |
| P60002            | ELOF1   | 76.5           | 9.6               |
| O75808            | CAPN15  | 75.0           | 6.4               |
| Q14191            | WRN     | 71.4           | 14.3              |
| P02462            | COL4A1  | 68.1           | 1.1               |
| Q8N357            | SLC35F6 | 64.3           | 1.7               |
| Q01484            | ANK2    | 63.5           | 20.4              |
| P35670            | ATP7B   | 56.9           | 20.7              |
| P04179            | SOD2    | 56.1           | 5.3               |
| Q9BQ15            | NABP2   | 52.9           | 8.6               |
| Q9Y6R0            | NUMBL   | 51.7           | 2.8               |
| P29353            | SHC1    | 50.3           | 2.5               |
| P02765            | AHSG    | 49.1           | 18.6              |
| Q9NZR1            | TMOD2   | 48.6           | 7.8               |
| Q86UY8            | NT5DC3  | 46.2           | 3.2               |
| P99999            | CYCS    | 43.7           | 11.4              |
| P14174            | MIF     | 42.2           | 5.2               |
| P51808            | DYNLT3  | 42.1           | 2.4               |
| P10253            | GAA     | 40.9           | 6.7               |
| Q9Y2Z9            | COQ6    | 40.8           | 9.7               |
| Q14687            | GSE1    | 40.7           | 9.1               |
| Q8IY63            | AMOTL1  | 40.7           | 22.5              |
| Q9UJF2            | RASAL2  | 40.5           | 3.3               |
| Q8IXK0            | PHC2    | 40.1           | 3.0               |
| O76024            | WFS1    | 40.0           | 5.6               |

**Table S2.** List of down-regulated proteins. Proteins decreasing in amount in HUVEC cultured the presence of DAR 16-II expressed as % decrease over HUVEC cultured on gelatin. Only the proteins with highly statistically significant ( $p < 0.01$ ,  $n = 3$ ) differences are displayed in the table.

| UniProt Accession | Gene ID  | Average Amount |                   |
|-------------------|----------|----------------|-------------------|
|                   |          | Change %       | Average deviation |
| P60673            | PFN3     | −40.1          | 8.4               |
| Q96GC9            | VMP1     | −40.7          | 2.9               |
| Q13796            | SHROOM2  | −41.0          | 0.8               |
| Q86WR7            | PROSER2  | −41.1          | 0.9               |
| Q8IZQ1            | WDFY3    | −41.3          | 1.9               |
| Q13686            | ALKBH1   | −41.5          | 1.1               |
| P28715            | ERCC5    | −42.3          | 0.6               |
| Q96F10            | SAT2     | −43.3          | 2.3               |
| P62857            | RPS28    | −43.4          | 0.8               |
| Q969X6            | CIRH1A   | −43.7          | 1.4               |
| Q96NS5            | ASB16    | −43.7          | 3.8               |
| Q5T280            | C9orf114 | −44.3          | 0.8               |
| Q9NQ4             | EXOSC5   | −44.3          | 1.2               |
| Q8TE02            | ELP5     | −44.4          | 1.4               |
| O00257            | CBX4     | −44.9          | 1.6               |
| P10109            | FDX1     | −45.2          | 1.0               |
| Q96R05            | RBP7     | −46.5          | 4.5               |
| P41221            | WNT5A    | −46.6          | 3.7               |
| Q92686            | NRGN     | −47.2          | 0.4               |
| P42226            | STAT6    | −47.4          | 0.3               |
| Q9H3C7            | GGNBP2   | −47.7          | 0.6               |
| Q8TCT9            | HM13     | −48.5          | 1.2               |
| Q2VPK5            | CTU2     | −48.6          | 1.7               |
| Q8TBZ6            | TRMT10A  | −50.4          | 1.1               |
| P43007            | SLC1A4   | −51.8          | 1.5               |
| Q9Y4E5            | ZNF451   | −52.8          | 1.9               |
| Q08722            | CD47     | −54.4          | 1.3               |
| Q9NWQ8            | PAG1     | −55.8          | 6.0               |
| Q6NYC1            | JMJD6    | −56.6          | 0.8               |
| Q14697            | GANAB    | −59.1          | 0.3               |
| Q8N475            | FSTL5    | −60.0          | 1.4               |
| P09669            | COX6C    | −60.4          | 2.5               |
| O96017            | CHEK2    | −61.0          | 3.3               |
| O75843            | AP1G2    | −62.0          | 2.6               |
| Q9Y5J1            | UTP18    | −65.7          | 0.9               |
| Q9NRR8            | CDC42SE1 | −66.2          | 2.5               |
